# Supplementary material for: Metals and organotins in multiple bivalve species in a one-off global survey
Source: Royal Society of Chemistry journal article supplement (doi:10.1039/c0em00698j), 2011-01-01
Supplement: c0em00698j.pdf [file c0em00698j.pdf]

***Metals and organotins in multiple bivalve species in a one-off global survey***

*Martin M. Larsen\*, Jakob Strand, Jan H. Christensen, Asger B. Hansen, Katrin Vorkamp, Ole Andersen*

**26 pages supplementary material (ESI) for Journal of Environmental Monitoring**

7 figures (SI-1 to SI-7)

6 tables (SI-1 to SI-6)

*Correlation of metals and TBT*

A simple correlation test (Microsoft Excel 2003, Data analysis toolkit, CORREL function) of the *Mytilus*-normalised data indicates that only for TBT, DBT and MBT, concentrations are strongly correlated, with correlation coefficients of 0.85 to 0.89 (table SI-4), also visible in the PCA loading plot (figure SI-3). Fe and Ni concentrations also correlate with a coefficient of 0.89; otherwise most concentration correlations are below 0.5. Concentrations of Cr in mussel tissue seem correlated with those of Ca and Al, with coefficients of 0.74 and 0.60 respectively. An interesting observation is that Cu concentrations correlate relatively strongly with DBT concentrations at 0.73, but also with TBT and MBT concentrations at 0.49 respectively 0.47. Cu is a main component of antifouling paints, also those containing TBT, typically 10-30% (up to 50%) of the paint is Cu<sub>2</sub>O or CuSCN. DBT is the first debutylation step of breakdown from TBT to Sn.

*Assessment criteria for Cu and Zn*

The OSPAR QSR 2010 did not assess Cu and Zn, so no revised LC and BAC are available. Instead, data are compared to the older Background/Reference Concentrations (B/RC) revised in 2005<sup>1</sup>. The B/RCs was a forerunner for LC and BAC, and is set up as a range, for Cu 0.76 to 1.11 mg kg<sup>-1</sup> WW and for Zn 11.6 to 30 mg kg<sup>-1</sup> WW, setting a range for the expected reference concentration for metals in the North Sea. A default conversion factor of 20% DW is used to convert B/RC values from WW to DW. The upper B/RC is lower than the LC used in the QSR 2010 (table 1) for Cd, Hg and Pb, at 56-73% of the LC used for these metals. Both Cu and Zn are essential elements actively taken up by mussels, and no EAC or EC food limit are set for these metals.

### *Assessment of Cu*

Concentration of Cu was high in the four *Isognomen* and *Brachidontes* samples from US Virgin Islands (figure Si-1). In the PCA analysis, they were clustered around approx. (1.0, 0.5) after species correction (figure SI-6), indicating a small residual Cu anomaly after normalisation. The species from the *Mytilidae* family at the US Virgin Islands (*Brachidontes*) was measured at twice the highest Cu concentration found at Perth industrial harbour. This could either indicate that there are intra-family differences for Cu between the *Mytilus* and *Brachidontes* Genus, that also needs to be taken into account when establishing the family correction factors or that Cu concentrations in mangroves generally are very high. The highest concentrations are found around the Solomon Islands (Rar1\_GEL\_R), New Zealand (NZ3\_MYT\_M) and Perth (Per7\_MYT\_M). At the other end of the scale, 15% of the samples were below the upper B/RC, with three sites below the lower B/RC: the reference station for Sydney (Syd1\_SAC\_R), Solomon Islands (Rar3\_SAC\_H), and *Saccostrea* and *Mytilus* from Hobart (Tas2\_SAC\_M; Tas2\_MYT\_M). Most samples from the Southern hemisphere were below the upper B/RC. From the Northern Hemisphere only two *Chlamys* reference stations from Greenland (GRL\_CHL\_R) and Faroe Islands (Rar1\_CHL\_R) were below the upper B/RC. Concentration differences spanned three orders of magnitude (two if the US Virgin Islands is disregarding), and the median concentration was two times the upper B/RC value.

### *Assessment of Zn*

For Zn, the highest concentration was found in Perth (PER7\_MYT\_H) at 3 times the upper B/RC concentration. There were very large corrections for *Isognomon* and *Saccostrea* employed, but the normalised concentrations were within the range of *Mytilus*. Concentrations in the Open water *Pectinadea* were below the lower B/RC value after normalisation, but even before normalisation held the lowest Zn concentration. 39% of the samples were within the B/RC range, including most samples from the Greenlandic reference coast and US Virgin Islands. Concentration differences spanned two orders of magnitude for Zn, and the median concentration was within the B/RC range.

FIGURES.

Figure SI-1: Assessment of measured copper and zinc concentrations. The vertical lines indicate the different locations, with sites ordered left to right from expected reference to highly polluted sites. Note logarithmic axis. Zn concentrations are shown in blue squares and Cu in green circles, with *Mytilus* shown as open squares/circles, and *Saccostrea/Isognomon* with filled square/circle, for Zn also *Chlamys* in light blue colour. Background reference concentrations indicated (lower B/RC limit dashed – upper full). The displayed concentrations are after normalisation (factors given in table 3), *Isognomon* only found at site 12, *Saccostrea* at site 7 to 9.

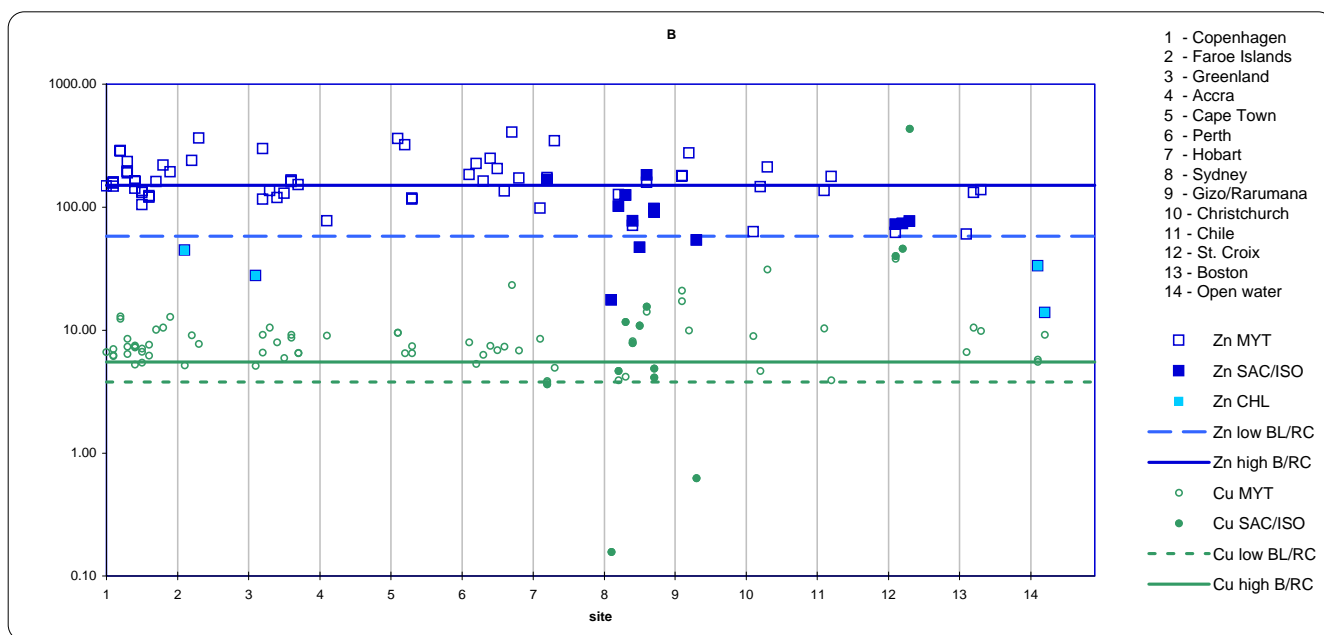

Figure SI-2: Linear relationships between *Saccostrea* and *Mytilus* from the same sites (units mg kg<sup>-1</sup>). See table 2 for correlation coefficients.

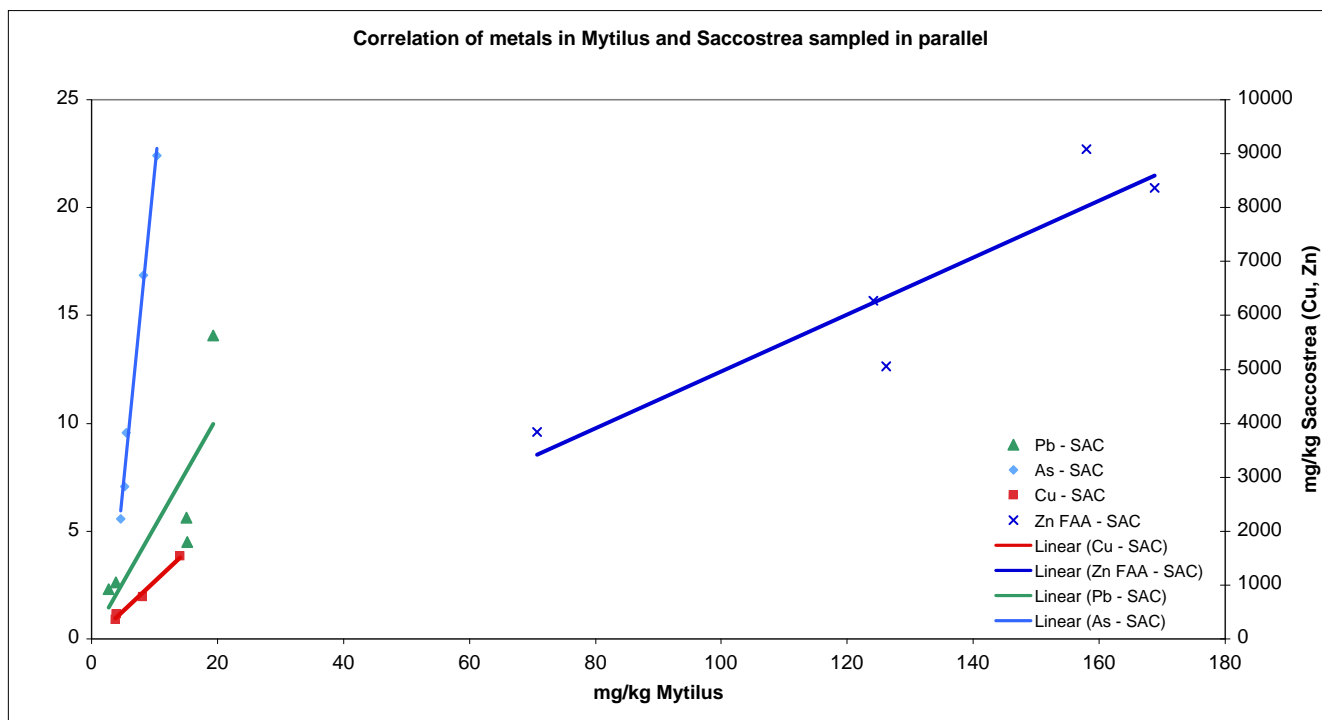

Figure SI-3: Relationships between TBT concentration (as  $\mu\text{g TBT-Sn kg}^{-1}$ ), species (*Geloina* and *Isognomon* pooled as GEL; *Mytilus*, *Perna* and *Brachidontes* pooled as Myt) and distance to the nearest (larger) harbour. Notice logarithmic Y-scale. Lines indicate the different assessment criteria from table 1 in the main text.

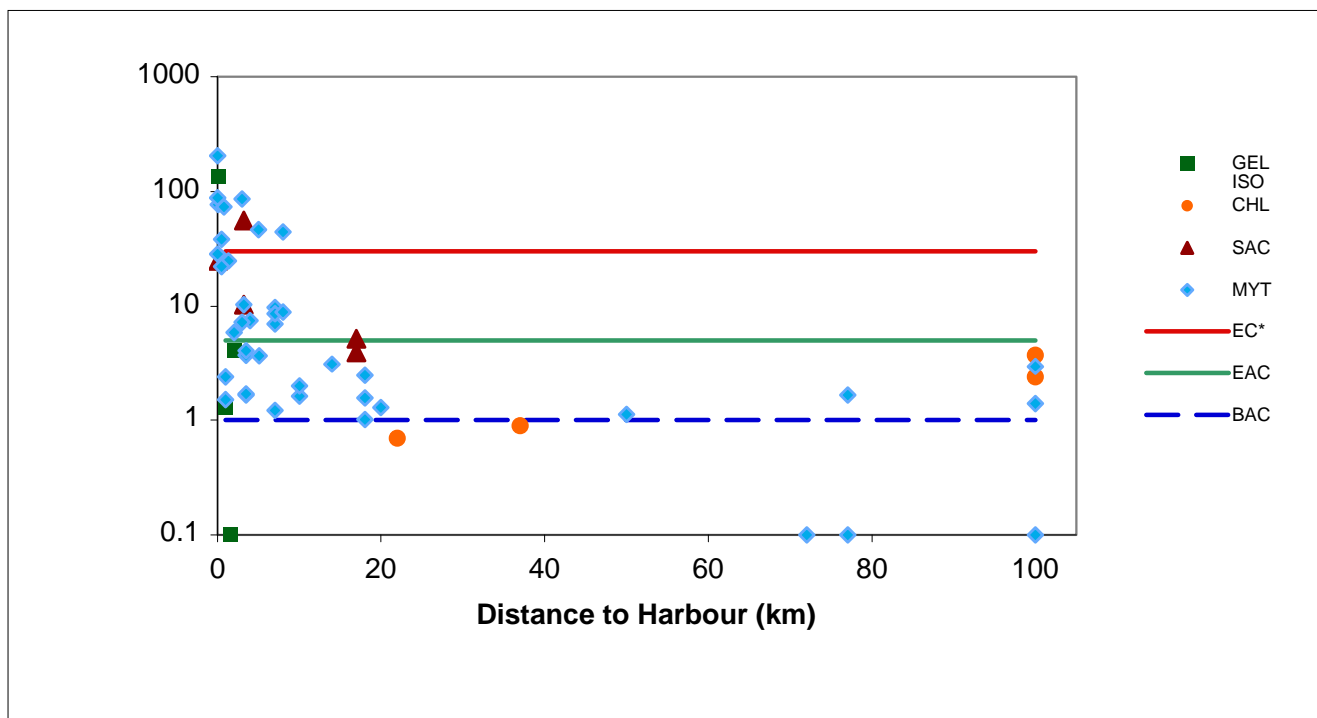

Figure SI-4: Mean centred score and loading plot for PCA analysis PC1 vs. PC2 of auto scaled concentration data before normalisation. Notice all *Saccostrea* stations (\_SAC\_) are in the lower left corner, separated from the bulk of the mussel data.

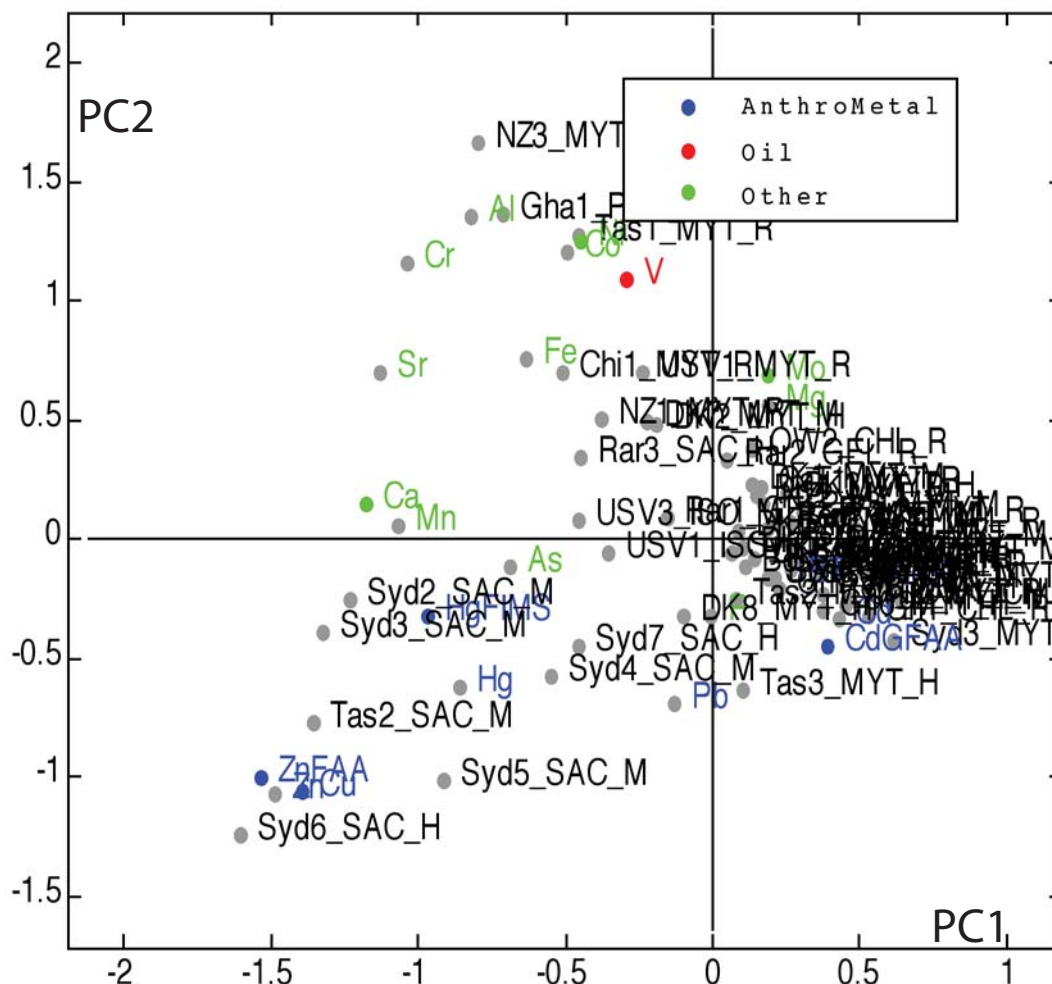



Figure SI-6. Bi-plot of PC1 (19,5%) vs. PC2 (14,8%) for PCA analysis after species normalisation to *Mytilus*, with the loadings coloured according to interpretations: Blue for Anthropogenic metals, red for oil-indicator (V), and green for other metals.

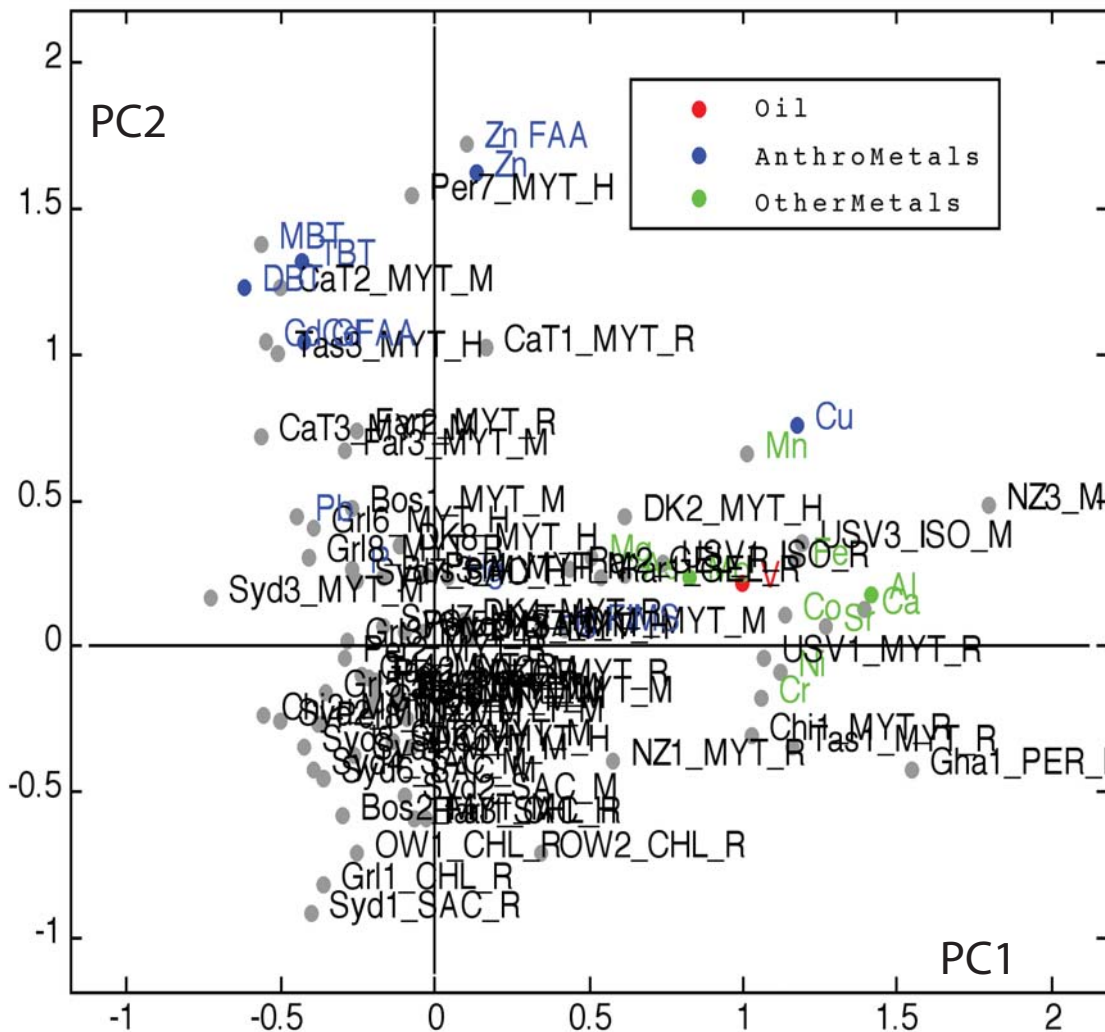



Figure SI-7. Bi-plot of PC1 (19,5%) vs. PC3 (9,3%) for PCA analysis after species normalisation to *Mytilus*, with the loadings coloured according to interpretations: Blue for Anthropogenic metals, red for oil-indicator (V), and green for other metals. The naming has been reduced to the four first letters to reduce cluttering.

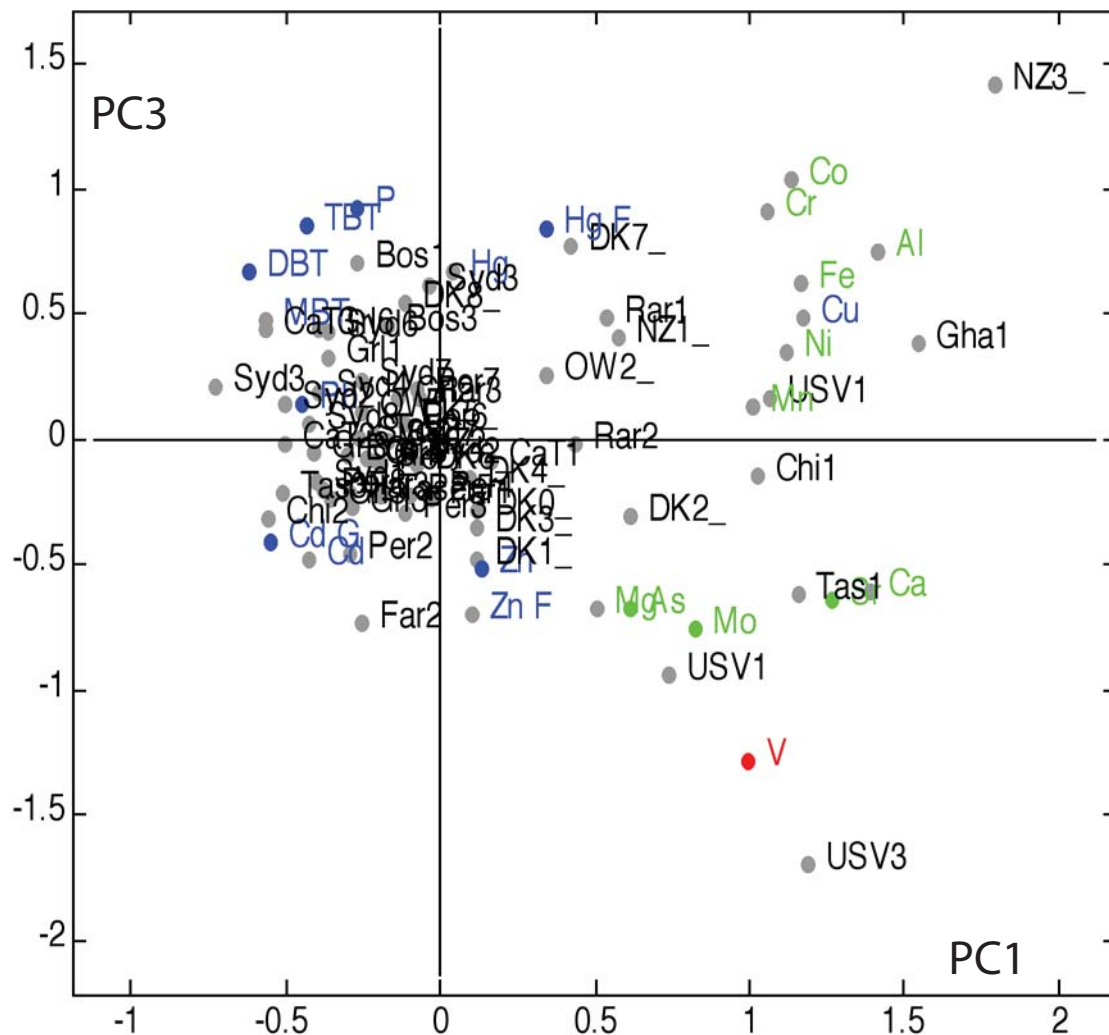

TABLES.

Table SI-1. QA information for samples: Detection limits and certified reference materials ( $\mu\text{g-Sn}$  or  $\text{mg}$  per  $\text{kg}$  dry weight ( $n=4$  for NIST 2976,  $n=5$  for CRM 477 ;  $n=9$  for internal reference material Marina)

| Element | CRM id    | CRM target | Measured | RSD   | DL*                        |
|---------|-----------|------------|----------|-------|----------------------------|
| Zn/FAA  | NIST 2976 | 137        | 136      | 1.9%  | $7.5 \text{ mg kg}^{-1}$   |
| Zn      | Marina    | 129        | 121      | 2.3%  | $7.5 \text{ mg kg}^{-1}$   |
| Hg/CVAA | NIST 2976 | 0.061      | 0.064    | 11.8% | $0.02 \text{ mg kg}^{-1}$  |
| Hg      | Marina    | 0.156      | 0.163    | 2.2%  | $0.02 \text{ mg kg}^{-1}$  |
| Cd/GFAA | NIST 2976 | 0.82       | 0.85     | 2.6%  | $0.02 \text{ mg kg}^{-1}$  |
| Cd      | Marina    | 0.72       | 0.98     | 6.3%  | $0.02 \text{ mg kg}^{-1}$  |
| Na      | NIST 2976 | 35000      | 37300    | 18.9% | $300 \text{ mg kg}^{-1}$   |
| Na      | Marina    | n.a.       | 8800     | 2.0%  | $300 \text{ mg kg}^{-1}$   |
| Mg      | NIST 2976 | 5300       | 5280     | 13.9% | $50 \text{ mg kg}^{-1}$    |
| Mg      | Marina    | n.a.       | 1650     | 2.1%  | $50 \text{ mg kg}^{-1}$    |
| Al      | NIST 2976 | 134        | 120      | 21%   | $20 \text{ mg kg}^{-1}$    |
| Al      | Marina    | n.a.       | 500      | 11.5% | $20 \text{ mg kg}^{-1}$    |
| K       | NIST 2976 | 9700       | 11900    | 13.9% | $150 \text{ mg kg}^{-1}$   |
| K       | Marina    | n.a.       | 4900     | 3.2%  | $150 \text{ mg kg}^{-1}$   |
| Ca      | NIST 2976 | 7600       | 6450     | 27%   | $250 \text{ mg kg}^{-1}$   |
| Ca      | Marina    | n.a.       | 3650     | 8.6%  | $250 \text{ mg kg}^{-1}$   |
| Cr      | NIST 2976 | 0.5        | 0.8      | 35%   | $0.3 \text{ mg kg}^{-1}$   |
| Cr      | Marina    | 0.95       | 1,06     | 6.9%  | $0.3 \text{ mg kg}^{-1}$   |
| Mn      | NIST 2976 | 33         | 31       | 36%   | $20 \text{ mg kg}^{-1}$    |
| Mn      | Marina    | n.a.       | 43       | 10.2  | $20 \text{ mg kg}^{-1}$    |
| Fe      | NIST 2976 | 171        | 52       | 250%  | $15 \text{ mg kg}^{-1}$    |
| Fe      | Marina    | n.a.       | 492      | 18.8% | $15 \text{ mg kg}^{-1}$    |
| Ni      | NIST 2976 | 0.93       | 0.87     | 37%   | $0.3 \text{ mg kg}^{-1}$   |
| Ni      | Marina    | 2.39       | 2.2      | 7.7%  | $0.3 \text{ mg kg}^{-1}$   |
| Co      | NIST 2976 | 0.61       | <dl      | 49%   | $0.6 \text{ mg kg}^{-1}$   |
| Co      | Marina    | n.a.       | 0.7      | 22%   | $0.6 \text{ mg kg}^{-1}$   |
| Cu      | NIST 2976 | 4.02       | 3.7      | 33%   | $2.5 \text{ mg kg}^{-1}$   |
| Cu      | Marina    | 7.01       | 6.4      | 5.4%  | $2.5 \text{ mg kg}^{-1}$   |
| As      | NIST 2976 | 13.3       | 12,6     | 2.5%  | $0.2 \text{ mg kg}^{-1}$   |
| As      | Marina    | 7.03       | 7,70     | 4.2%  | $0.2 \text{ mg kg}^{-1}$   |
| Sr      | NIST 2976 | 93         | 63       | 16%   | $1 \text{ mg kg}^{-1}$     |
| Sr      | Marina    | n.a.       | 37       | 4.8%  | $1 \text{ mg kg}^{-1}$     |
| Pb      | NIST 2976 | 1.19       | 1.00     | 37%   | $0.3 \text{ mg kg}^{-1}$   |
| Pb      | Marina    | 1.35       | 0.94     | 11.5% | $0.3 \text{ mg kg}^{-1}$   |
| U       | NIST 2976 | 0.0013     | <dl      | 26%   | $0.2 \text{ mg kg}^{-1}$   |
| TBT     | CRM 477   | 900        | 867      | 12.1% | $1 \mu\text{g-Sn kg}^{-1}$ |
| DBT     | CRM 477   | 785        | 793      | 13.1% | $1 \mu\text{g-Sn kg}^{-1}$ |
| MBT     | CRM 477   | 913        | 855      | 17.4% | $1 \mu\text{g-Sn kg}^{-1}$ |

n.a.: No target value available; Red colour: QA data not <15% RSD, or outside of 85-115% recovery, often due to reference material close to accredited detection limit. In some cases better DL is achieved in the actual run, based on replicate analysis of blanks. In this case, concentrations above the actual DL have been reported.

Table SI-2. Bivalve species sampled, area of origin, description of the study area and distance to probable sources of heavy metals and organotins. The sample ID gives abbreviations of the site (DK# for Denmark, family code (specific species is given in bivalve species column) and the sample category (H: harbour, C: coast, R: reference). The nearest contamination source for coast/reference sites in remote location is taken as the nearest build-up area.

| PCA code  | Station name, comment                               | Area type                 | Bivalve species       | WGS84 N    | WGS 84 E   | Major city/ harbour (km) | Nearest contam. source (km) | # in pool | Weighted length (mm) | Size class of mussel pool |
|-----------|-----------------------------------------------------|---------------------------|-----------------------|------------|------------|--------------------------|-----------------------------|-----------|----------------------|---------------------------|
| DK0_MYT_R | Køge, coast south of Copenhagen                     | Reference                 | <i>Mytilus edulis</i> | 55°29'36"N | 12°25'24"E | 14                       | 12                          | 77        | 44.6                 | 40-65                     |
| DK1_MYT_M | Great Belt sea, coast of Agersø Island,             | Coastal with ship traffic | <i>Mytilus edulis</i> | 55°14'42"N | 11°11'42"E | 7                        | 5.4                         | 30        | 60.5                 | 50-70                     |
| DK1_MYT_M | Replicate                                           | “                         | “                     | “          | “          | 7                        | 5.4                         | 25        | 61.3                 | 50-80                     |
| DK1_MYT_M | Replicate                                           | “                         | “                     | “          | “          | 7                        | 5.4                         | 30        | 63.0                 | 55-70                     |
| DK2_MYT_H | Roskilde Fjord, former industrial site (steel mill) | Fjord with ship traffic   | <i>Mytilus edulis</i> | 55°57'30"N | 12°01'0"E  | 1                        | 0.2                         | 80        | 49.9                 | 40-60                     |
| DK2_MYT_H | Replicate                                           | “                         | “                     | “          | “          | 1                        | 0.2                         | 80        | 49.9                 | 40-60                     |

|           |                                |                                            |                       |            |            |     |     |    |      |       |
|-----------|--------------------------------|--------------------------------------------|-----------------------|------------|------------|-----|-----|----|------|-------|
| DK3_MYT_H | Odense Fjord                   | Fjord with ship traffic and major Shipyard | <i>Mytilus edulis</i> | 55°28'59"N | 10°30'36"E | 7   | 2   | 20 | 63.8 | 50-85 |
| DK3_MYT_H | “                              | “                                          | “                     | “          | “          | 7   | 2   | 22 | 57.0 | 50-70 |
| DK3_MYT_H | Analytical replicate           |                                            | <i>Mytilus edulis</i> | 55°28'59"N | 10°30'36"E | 7   | 2   | 22 | 57.0 | 50-70 |
| DK4_MYT_R | Nivå Bay, North of Copenhagen, | Coastal with ship traffic                  | <i>Mytilus edulis</i> | 55°54'48"N | 12°32'06"E | 18  | 1.1 | 31 | 59.0 | 50-70 |
| DK4_MYT_R | Analytical replicate           | “                                          | “                     | “          | “          | 18  | 1.1 | 31 | 59.0 | 50-70 |
| DK4_MYT_R | Replicate                      | “                                          | “                     | “          | “          | 18  | 1.1 | 26 | 64.8 | 55-80 |
| DK4_MYT_R | Replicate                      | “                                          | “                     | “          | “          | 18  | 1.1 | 28 | 63.9 | 55-75 |
| DK5_MYT_M | Skovshoved                     | Coastal with ship traffic                  | <i>Mytilus edulis</i> | 55°48'10"N | 12°35'39"E | 3.5 | 4   | 30 | 59.3 | 45-70 |
| DK5_MYT_M | Analytical replicate           | “                                          | “                     | “          | “          | 3.5 | 4   | 30 | 59.3 | 45-70 |
| DK5_MYT_M | Replicate                      | “                                          | “                     | “          | “          | 3.5 | 4   | 24 | 62.9 | 55-70 |

|            |                                    |                                                           |                            |            |            |      |     |      |      |         |
|------------|------------------------------------|-----------------------------------------------------------|----------------------------|------------|------------|------|-----|------|------|---------|
| DK6_MYT_H  | Copenhagen Lynetten The sound      | Close to outlet from municipal wastewater treatment plant | <i>Mytilus edulis</i>      | 55°43'35"N | 12°37'52"E | 3.5  | 3   | 33   | 61.9 | 55-70   |
| DK6_MYT_H  | replicate                          | “                                                         | “                          | “          | “          | 3.5  | 3   | 30   | 62.8 | 55-70   |
| DK7_MYT_M  | Copenhagen harbour,                | Outer pier, Trekroner fortres                             | <i>Mytilus edulis</i>      | 55°42'15"N | 12°36'43"E | 1.5  | 3   | 212  | 38.8 | 25-65   |
| DK8_MYT_H  | Copenhagen southern harbour        | Less trafficated Harbour                                  | <i>Mytilus edulis</i>      | 55°39'53"N | 12°34'01"E | 0.5  | 3   | 80   | 40.7 | 25-60   |
| DK9_MYT_H  | Copenhagen main harbour            | Main harbour                                              | <i>Mytilus edulis</i>      | 55°41'36"N | 12°36'0"E  | 0    | 0.5 | 85   | 41.3 | 25-55   |
| Far1_CHL_R | Open water off Nolsoy              | Reference                                                 | <i>Chlamys opercularis</i> | 62°02'17"N | 6°30'0"W   | 37.0 | 37  | 20   | 64.8 | 50-75   |
| Far2_MYT_R | Faroe Islands                      | Coastal reference                                         | <i>Mytilus edulis</i>      | 62°01'0"N  | 6°45'0"W   | 1.5  | 1.5 | n.r. | n.r. | n.r.    |
| Far3_MYT_M | Skalafjord coast with ship traffic | Coastal with ship traffic                                 | <i>Mytilus edulis</i>      | 62°10'54"N | 6°47'56"W  | 1.3  | 1.3 | n.r. | n.r. | n.r.    |
| Gr11_CHL_R | Coast near Sisimiut                | Coastal reference                                         | <i>Chlamys islandica</i>   | 66°55'24"N | 54°11'45"W | 22.0 | 22  | 40   | 65.8 | 30- >90 |

|            |                                      |                           |                       |            |            |       |      |     |      |        |
|------------|--------------------------------------|---------------------------|-----------------------|------------|------------|-------|------|-----|------|--------|
| Gr12_MYT_M | Central West coast near Qeqertarsuaq | Coastal with ship traffic | <i>Mytilus edulis</i> | 64°27'26"N | 50°14'07"W | 77.0  | 3.0  | 87  | 54.9 | 45-75  |
| Gr13_MYT_R | Bredefjord, coast                    | Coastal reference         | <i>Mytilus edulis</i> | 60°43'07"N | 46°59'17"W | 100.0 | 12.0 | 90  | 50.1 | 25-80  |
| Gr14_MYT_R | Coast near Sisimiut                  | Coastal reference         | <i>Mytilus edulis</i> | 66°53'35"N | 53°15'0"W  | 20.0  | 20   | 78  | 48.8 | 20-90  |
| Gr15_MYT_R | Coast near Naatalik                  | Coastal reference         | <i>Mytilus edulis</i> | 60°07'18"N | 45°15'16"W | 100.0 | 2.6  | 20  | 46.0 | 30-55  |
| Gr16_MYT_R | Coast near Sisimiut                  | Coastal reference         | <i>Mytilus edulis</i> | 66°56'03"N | 53°44'57"E | 3.0   | 3    | 49  | 51.8 | 20->90 |
| Gr17_MYT_H | Nuuk harbour                         | Harbour/marina            | <i>Mytilus edulis</i> | 64°10'09"N | 51°43'38"W | 5.1   | 5    | 99  | 51.7 | 30-85  |
| Gr18_MYT_M | Nuuk harbour, outer pier             | Outer Pier                | <i>Mytilus edulis</i> | 64°09'48"N | 51°44'16"E | 0.5   | 0.5  | 121 | 55.1 | 35-80  |
| Gha1_PER_R | Coast near Accra                     | Coastal reference         | <i>Perna perna</i>    | 5°29'17"N  | 0°22'30"W  | 20    | 20   | 152 | 17.3 | 10-35  |
| CaT1_MYT_R | Coast near Cape Town, ship traffic   | Coastal reference         | <i>Perna perna</i>    | 33°56'38"S | 18°22'24"E | 8.0   | 1.0  | 152 | 29.8 | 25-50  |
| CaT2_MYT_M | Coast near Cape Town                 | Coastal with ship traffic | <i>Perna perna</i>    | 33°54'54"S | 18°23'13"E | 5.0   | 0.5  | 71  | 41.7 | 30-65  |

|            |                                              |                           |                       |            |             |     |     |     |      |        |
|------------|----------------------------------------------|---------------------------|-----------------------|------------|-------------|-----|-----|-----|------|--------|
| CaT3_MYT_M | Pier at Cape Town                            | Outer Pier                | <i>Mytilus sp</i>     | 33°53'54"S | 18°25'46"E  | 0.8 | 0.8 | 47  | 77.9 | 55->90 |
| Per1_MYT_R | Fremantle reference (0-1 m)                  | Coastal reference         | <i>Mytilus edulis</i> | 32°03'19"S | 115°43'01"E | 2.0 | 2.0 | 86  | 47.8 | 35-75  |
| Per2_MYT_R | Fremantle outside harbour (0-1m)             | Coastal with ship traffic | <i>Mytilus edulis</i> | 32°03'14"S | 115°42'24"E | 3.0 | 3.0 | 66  | 45.7 | 35-65  |
| Per3_MYT_M | Perth, Swan River (0-1 m)                    | River with ship traffic   | <i>Mytilus edulis</i> | 32°02'28"S | 115°45'23"E | 1.2 | 1.2 | 48  | 65.3 | 50-80  |
| Per4_MYT_M | Perth, Swan River, The Coombe                | River with ship traffic   | <i>Mytilus edulis</i> | 32°01'07"S | 115°46'35"E | 5   | 1.1 | 80  | 62.8 | 45-85  |
| Per5_MYT_M | Perth, Swan River Fremantle Bridge (0-1m)    | River with ship traffic   | <i>Mytilus edulis</i> | 32°00'24"S | 115°47'08"E | 6.0 | 1.4 | 56  | 45.7 | 35-60  |
| Per6_MYT_M | Perth, Swan River Kingspark boathouse (0-1m) | River with ship traffic   | <i>Mytilus edulis</i> | 31°58'14"S | 115°49'21"E | 3.4 | 1.1 | 86  | 51.1 | 40-70  |
| Per7_MYT_H | Freemantle harbour (0-1m)                    | Harbour                   | <i>Mytilus edulis</i> | 32°03'34"S | 115°44'11"E | 0.0 | 0.0 | 119 | 52.0 | 35-70  |

|            |                                 |                             |                             |             |             |       |     |     |      |        |
|------------|---------------------------------|-----------------------------|-----------------------------|-------------|-------------|-------|-----|-----|------|--------|
| Per8_MYT_H | Freemantle inner harbour (0-1m) | Harbour                     | <i>Mytilus edulis</i>       | 32°02'31"S  | 115°43'33"E | 0.5   | 0.5 | 89  | 52.7 | 20-90  |
| Tas1_MYT_R | Hobart 2                        | Coastal reference           | <i>Mytilus sp</i>           | 43°01'32"S  | 147°55'40"E | 50.0  | 2.0 | 109 | 36.5 | 30-50  |
| Tas2_MYT_M | Hobart 1                        | Costal with ship traffic    | <i>Mytilus sp</i>           | 43°01'41"S  | 147°24'48"E | 17.0  | 0.5 | 80  | 47.1 | 35-80  |
| Tas2_SAC_M | Species replicat                | „                           | <i>Saccostrea sp</i>        | „           | „           | 17.0  | 0.5 | 15  | 50.0 | n.a.   |
| Tas3_MYT_H | Hobart 3                        | Harbour                     | <i>Perna perna</i>          | 42°53'05"S  | 147°20'0"E  | 0.1   | 1   | 0   | 50.0 | 40-85  |
| Syd1_SAC_R | Lake Conjola 2                  | Coastal reference           | <i>Saccostrea glomerata</i> | 35°15'34"S  | 150°29'14"E | 100.0 | 1.0 | 22  | 49.3 | 35-65  |
| Syd2_SAC_M | Sydney 7 Rose Bay               | Outer Pier                  | <i>Saccostrea glomerata</i> | 33°51'02''S | 151°16'21"E | 8.0   | 0.2 | 19  | 51.4 | 35-60  |
| Syd2_MYT_M | Species replicate               | „                           | <i>Mytilus sp</i>           | „           | „           | 8.0   | 0.2 | 34  | 69.3 | 45-90  |
| Syd3_MYT_M | Sydney 2 Iron Cove              | Outer Pier                  | <i>Mytilus sp</i>           | 33°51'56"S  | 151°09'18"E | 3.2   | 0.1 | 0   | 50.0 | 55->90 |
| Syd3_SAC_M | Species replicate               | „                           | <i>Saccostrea glomerata</i> | „           | „           | 3.2   | 0.1 | 35  | 63.9 | 40-85  |
| Syd4_MYT_M | Sydney 4 Lane Cove              | Estuarie heavy ship traffic | <i>Mytilus edulis</i>       | 33°49'48"S  | 151°08'51"E | 6.0   | 0.1 | 45  | 70.9 | 40->90 |



|            |                                         |                              |                             |            |             |     |     |    |      |        |
|------------|-----------------------------------------|------------------------------|-----------------------------|------------|-------------|-----|-----|----|------|--------|
| Syd4_SAC_M | Species replicate                       | ”                            | <i>Saccostrea glomerata</i> | ”          | ”           | 6.0 | 0.1 | 24 | 62.1 | 40-80  |
| Syd5_SAC_M | Sydney 6 Paradise Island Sydney Harbour | Outer Pier                   | <i>Saccostrea glomerata</i> | 33°51'34"S | 151°15'55"E | 7.0 | 0.4 | 37 | 56.7 | 35-80  |
| Syd6_MYT_H | Sydney 3 Darling Harbour                | Harbour                      | <i>Mytilus edulis</i>       | 33°52'18"S | 151°11'23"E | 1.4 | 0.3 | 49 | 62.5 | 40-85  |
| Syd6_SAC_H | Species replicate                       | ”                            | <i>Saccostrea glomerata</i> | ”          | ”           | 1.4 | 0.3 | 26 | 56.0 | 35-80  |
| Syd7_SAC_H | Sydney 1 Iron Cove                      | Harbour                      | <i>Saccostrea glomerata</i> | 33°52'10"S | 151°8'38"E  | 4.2 | 0.1 | 30 | 70.1 | 40->90 |
| Syd7_SAC_H | Analytical replicate                    | ”                            | ”                           | ”          | ”           | 4.2 | 0.1 | 30 | 70.1 | 40->90 |
| Rar1_GEL_R | Rarumana 1                              | Coastal reference (mangrove) | <i>Geloina coaxans</i>      | 8°13'58"S  | 157°03'21"E | 27  | 27  | 0  | 50.0 |        |
| Rar1_GEL_R | Analytical replicate                    | ”                            | ”                           | ”          | ”           | 27  | 27  | 0  | 50.0 |        |
| Rar2_GEL_R | Gizo 2                                  | Coastal reference (mangrove) | <i>Geloina coaxans</i>      | 8°05'19"S  | 156°50'10"E | 1.5 | 2   | 0  | 50.0 |        |

|            |                          |                              |                             |            |             |     |     |     |      |         |
|------------|--------------------------|------------------------------|-----------------------------|------------|-------------|-----|-----|-----|------|---------|
| Rar3_SAC_H | NGI (New Georgia Island) | Harbour                      | <i>Saccostrea sp</i>        | 8°14'08"S  | 157°11'45"E | 0   | 1.5 | 12  | 81.9 | 50- >90 |
| NZ1_MYT_R  | Christchurch CE-1        | Coastal reference            | <i>Mytilus sp</i>           | 43°33'24"S | 172°43'30"E | 4   | 5   | 47  | 41.4 | 35-50   |
| NZ2_MYT_M  | Christchurch CE-3        | Costal with ship traffic     | <i>Mytilus sp</i>           | 43°33'51"S | 172°45'0"E  | 2   | 3   | 30  | 57.5 | 55 - 80 |
| NZ3_MYT_M  | Christchurch CE-2        | Costal with ship traffic     | <i>Mytilus sp</i>           | 43°33'33"S | 172°42'36"E | 0.5 | 1.5 | 20  | 44.8 | 30-55   |
| Chi1_MYT_R | Chile Skærgård           | Costal refence               | <i>Mytilus sp</i>           | 50°21'0"S  | 74°50'0"W   | 100 | 12  | 20  | 69.3 | 55- 90  |
| Chi2_MYT_R | Isla Chiloe              | Kyst reference               | <i>Mytilus sp</i>           | 42°10'0"S  | 72°36'0"W   | 72  | 60  | 25  | 65.1 | 55-75   |
| USV1_MYT_R | Salt-1, St. Croix        | Coastal reference (mangrove) | <i>Brachidontes exustus</i> | 17°46'16"N | 64°45'09"W  | 1   | 4   | 309 | 28.8 | 20 - 40 |
| USV1_ISO_R | Species replicat         | „                            | <i>Isognomon alatus</i>     | „          | „           | 1   | 4   | 254 | 52.6 | 15-80   |
| USV3_ISO_M | Hovenssa, St. Croix      | Estuarie with ship traffic   | <i>Isognomon alatus</i>     | 17°41'44"N | 64°45'50"W  | 2   | 1.5 | 186 | 35.4 | 20-70   |
| USV2_ISO_H | Salt-3, St. Croix        | Marina (Mangrove)            | <i>Isognomon alatus</i>     | 17°46'31"N | 64°45'40"W  | 0.1 | 0.1 | 57  | 41.0 | 20-60   |

|            |                      |                           |                          |            |            |     |     |    |      |        |
|------------|----------------------|---------------------------|--------------------------|------------|------------|-----|-----|----|------|--------|
| Bos1_MYT_M | Boston-2             | Outer pier                | <i>Mytilus edulis</i>    | 2°22'14"N  | 71°03'29"W | 0.1 | 0.1 | 63 | 51.2 | 35-65  |
| Bos3_MYT_H | Boston-5             | Old industrial Harbour    | <i>Mytilus edulis</i>    | 42°21'47"N | 71°01'50"W | 0.5 | 5   | 44 | 56.7 | 40-70  |
| Bos2_MYT_M | Boston-4             | Coastal with ship traffic | <i>Mytilus edulis</i>    | 42°20'21   | 71°00'38"W | 7.0 | 0.5 | 26 | 63.5 | 55-85  |
| OW1_CHL_R  | New Foundland Banq-1 | Reference                 | <i>Chlamys islandica</i> | 44°20'0"N  | 58°28'0"W  | 100 | 125 | 9  | 95.8 | 85->90 |
| OW1_CHL_R  | ”                    | ”                         | <i>Chlamys islandica</i> | ”          | ”          | 100 | 125 | 9  | 95.8 | 85->90 |
| OW2_CHL_R  | Shetland Pent-1      | Reference                 | <i>Tapes pullastra</i>   | 58°49'49"N | 3°02'44"W  | 100 | 4   | 13 | 51.0 | 30-65  |

#: number; n.a.: not available.; n.r.: Not recorded

**Replicate explanations:** *Species replicate*: Two species sampled at the same station; *Replicate*: Two individual samplings, individual pools and homogenisation (“true” replicate); *Analytical: replicate*: Two digestions of one pool of mussels after homogenisation;

Table SI-3. Phylogenetic tree of species analysed, mainly based on the ITIS system (www.itis.gov)

|                 |                                                                     |                 |                   |                  |                                                |                                                    |                     |                                  |
|-----------------|---------------------------------------------------------------------|-----------------|-------------------|------------------|------------------------------------------------|----------------------------------------------------|---------------------|----------------------------------|
| Kingdom         | Animalia                                                            |                 |                   |                  |                                                |                                                    |                     |                                  |
| Phylum          | Mollusca                                                            |                 |                   |                  |                                                |                                                    |                     |                                  |
| Class           | Bivalvia                                                            |                 |                   |                  |                                                |                                                    |                     |                                  |
| Subclass        | Pteriomorpha                                                        |                 |                   |                  |                                                |                                                    | Heterodonta         |                                  |
| Order           | Mytiloida                                                           |                 |                   | Pterioida        | Ostreoida                                      |                                                    | Veneroida           |                                  |
| Family          | Mytilidae                                                           |                 |                   | Isognomonidae    | Pectinidae                                     | Ostreidae                                          | Veneridae           | Corbiculidae                     |
| Genus           | Mytilus                                                             | Perna           | Brachidontes      | Isognomon        | Chlamys                                        | Saccostrea                                         | Tapes               | Polymesoda                       |
| Species sampled | <i>M. edulis</i> ,<br><i>M. galloprovincialis</i> ,<br><i>M. sp</i> | <i>P. perna</i> | <i>B. exustus</i> | <i>I. alatus</i> | <i>C. opercularis</i> ,<br><i>C. islandica</i> | <i>S. glomerata</i> <sup>*/#</sup><br><i>S. sp</i> | <i>T. pullastra</i> | <i>P. coaxans</i> <sup>*/§</sup> |

\*: Species name not found in ITIS

#: Endemic to New Zealand/Australia ([www.molusca.co.nz](http://www.molusca.co.nz); Gould, 1850)

§: Corbicula Clams, indo-pacific regi (*polymesoda (Geloina) coaxans* (zipcodezoo.com; Gmelin, 1791))

sp: Species only determined to Genus level.

Tabel SI-4. Microsoft Excel 2003 Correl matrix on un-normalised data (29 parameters, 89 individual samples).

|         | TS     | Cd GFAA | Zn     | Cd     | Hg FIMS | Hg     | Pb     | Cu     | Zn     | P      | Ni     | Mg     | Al     | Ca     |
|---------|--------|---------|--------|--------|---------|--------|--------|--------|--------|--------|--------|--------|--------|--------|
| TS      | 1.000  |         |        |        |         |        |        |        |        |        |        |        |        |        |
| Cd GFAA | 0.055  | 1.000   |        |        |         |        |        |        |        |        |        |        |        |        |
| Zn      | 0.055  | 0.491   | 1.000  |        |         |        |        |        |        |        |        |        |        |        |
| Cd      | -0.066 | 0.753   | 0.410  | 1.000  |         |        |        |        |        |        |        |        |        |        |
| Hg FIMS | 0.163  | -0.051  | -0.004 | -0.065 | 1.000   |        |        |        |        |        |        |        |        |        |
| Hg      | 0.034  | -0.061  | -0.041 | -0.072 | 0.978   | 1.000  |        |        |        |        |        |        |        |        |
| Pb      | 0.201  | 0.334   | 0.147  | 0.212  | 0.027   | 0.008  | 1.000  |        |        |        |        |        |        |        |
| Cu      | 0.197  | -0.054  | 0.044  | -0.096 | 0.000   | -0.026 | -0.065 | 1.000  |        |        |        |        |        |        |
| Zn      | -0.064 | 0.236   | 0.656  | 0.278  | -0.082  | -0.084 | 0.118  | 0.402  | 1.000  |        |        |        |        |        |
| P       | 0.052  | 0.034   | 0.113  | 0.065  | 0.152   | 0.075  | 0.119  | -0.054 | -0.072 | 1.000  |        |        |        |        |
| Ni      | -0.022 | -0.049  | -0.081 | -0.039 | 0.050   | 0.034  | -0.131 | 0.225  | 0.029  | 0.127  | 1.000  |        |        |        |
| Mg      | 0.035  | -0.041  | 0.291  | -0.089 | 0.026   | 0.014  | -0.164 | 0.098  | 0.331  | -0.125 | -0.053 | 1.000  |        |        |
| Al      | 0.136  | -0.101  | 0.006  | -0.082 | -0.016  | -0.058 | 0.007  | 0.257  | 0.103  | -0.020 | 0.345  | 0.061  | 1.000  |        |
| Ca      | 0.381  | -0.020  | 0.070  | -0.062 | 0.002   | -0.046 | -0.078 | 0.153  | 0.084  | -0.172 | 0.345  | 0.496  | 0.485  | 1.000  |
| Mn      | -0.073 | -0.112  | 0.200  | -0.116 | 0.047   | 0.057  | -0.078 | 0.416  | 0.591  | -0.089 | 0.078  | 0.630  | 0.267  | 0.300  |
| K       | -0.196 | 0.013   | -0.017 | 0.000  | 0.034   | 0.011  | -0.083 | -0.190 | -0.234 | 0.430  | -0.165 | 0.118  | -0.156 | -0.236 |
| V       | -0.019 | 0.016   | 0.006  | 0.042  | -0.066  | -0.007 | -0.009 | -0.013 | 0.116  | -0.147 | 0.436  | 0.258  | 0.203  | 0.372  |
| Cr      | 0.322  | 0.006   | 0.164  | -0.012 | 0.143   | 0.095  | -0.095 | 0.326  | 0.193  | 0.078  | 0.335  | 0.383  | 0.604  | 0.742  |
| Co      | -0.094 | -0.224  | -0.170 | -0.186 | -0.046  | -0.045 | 0.050  | 0.416  | 0.036  | 0.104  | 0.295  | -0.177 | 0.588  | 0.049  |
| Fe      | 0.065  | -0.198  | -0.026 | -0.190 | -0.011  | -0.022 | -0.094 | 0.011  | -0.016 | -0.168 | 0.149  | 0.218  | 0.153  | 0.238  |
| Fe      | 0.146  | -0.020  | 0.026  | -0.011 | 0.150   | 0.086  | -0.091 | 0.073  | -0.096 | 0.291  | 0.896  | 0.044  | 0.353  | 0.421  |
| As      | 0.131  | -0.116  | -0.088 | -0.083 | -0.103  | -0.137 | 0.126  | 0.090  | 0.107  | 0.069  | 0.089  | -0.021 | 0.036  | 0.049  |
| Sr      | 0.064  | -0.015  | 0.028  | -0.046 | -0.088  | -0.098 | -0.058 | 0.033  | 0.092  | -0.108 | 0.350  | -0.022 | 0.379  | 0.524  |
| Mo      | -0.347 | -0.035  | -0.133 | 0.125  | -0.073  | 0.011  | -0.229 | 0.198  | 0.094  | -0.265 | 0.173  | 0.007  | 0.075  | 0.015  |
| Th      | 0.162  | -0.071  | -0.057 | 0.004  | 0.022   | -0.003 | 0.147  | -0.004 | -0.048 | 0.342  | -0.026 | -0.190 | 0.310  | -0.006 |
| U       | -0.523 | 0.070   | 0.085  | 0.092  | -0.230  | -0.091 | -0.175 | -0.064 | 0.179  | -0.202 | 0.223  | -0.033 | 0.057  | -0.047 |
| TBT     | 0.231  | 0.125   | 0.162  | 0.031  | 0.027   | -0.010 | 0.068  | 0.490  | 0.267  | 0.224  | 0.156  | -0.130 | 0.014  | -0.032 |
| DBT     | 0.272  | 0.084   | 0.067  | -0.021 | -0.011  | -0.047 | 0.043  | 0.730  | 0.284  | 0.047  | 0.185  | -0.133 | 0.037  | -0.039 |
| MBT     | 0.157  | 0.075   | 0.138  | -0.015 | 0.024   | -0.004 | 0.024  | 0.477  | 0.227  | 0.122  | 0.211  | -0.118 | -0.016 | -0.048 |

Tabel SI-4, Continued

|     | <i>Mn</i> | <i>K</i> | <i>V</i> | <i>Cr</i> | <i>Co</i> | <i>Fe</i> | <i>Fe</i> | <i>As</i> | <i>Sr</i> | <i>Mo</i> | <i>Th</i> | <i>U</i> | <i>TBT</i> | <i>DBT</i> | <i>MBT</i> |
|-----|-----------|----------|----------|-----------|-----------|-----------|-----------|-----------|-----------|-----------|-----------|----------|------------|------------|------------|
| Mn  | 1.000     |          |          |           |           |           |           |           |           |           |           |          |            |            |            |
| K   | -0.263    | 1.000    |          |           |           |           |           |           |           |           |           |          |            |            |            |
| V   | 0.255     | -0.279   | 1.000    |           |           |           |           |           |           |           |           |          |            |            |            |
| Cr  | 0.354     | -0.119   | 0.230    | 1.000     |           |           |           |           |           |           |           |          |            |            |            |
| Co  | 0.141     | -0.051   | 0.007    | 0.241     | 1.000     |           |           |           |           |           |           |          |            |            |            |
| Fe  | 0.139     | -0.114   | 0.142    | 0.158     | 0.164     | 1.000     |           |           |           |           |           |          |            |            |            |
| Fe  | 0.000     | -0.068   | 0.338    | 0.449     | 0.219     | 0.208     | 1.000     |           |           |           |           |          |            |            |            |
| As  | -0.016    | 0.116    | 0.079    | 0.007     | 0.262     | -0.094    | 0.048     | 1.000     |           |           |           |          |            |            |            |
| Sr  | 0.039     | -0.107   | 0.333    | 0.325     | 0.098     | 0.094     | 0.241     | 0.099     | 1.000     |           |           |          |            |            |            |
| Mo  | 0.156     | 0.029    | 0.160    | -0.012    | 0.196     | 0.057     | -0.084    | -0.066    | 0.208     | 1.000     |           |          |            |            |            |
| Th  | 0.113     | -0.256   | 0.175    | 0.123     | 0.430     | 0.030     | 0.066     | -0.046    | -0.149    | -0.143    | 1.000     |          |            |            |            |
| U   | 0.085     | -0.047   | 0.366    | -0.095    | 0.106     | 0.103     | -0.021    | -0.090    | 0.365     | 0.535     | -0.203    | 1.000    |            |            |            |
| TBT | 0.084     | -0.156   | -0.095   | 0.064     | 0.173     | 0.007     | 0.103     | 0.007     | -0.104    | -0.031    | 0.161     | -0.103   | 1.000      |            |            |
| DBT | 0.106     | -0.241   | -0.114   | 0.057     | 0.244     | -0.007    | 0.058     | -0.003    | -0.094    | 0.052     | 0.042     | -0.120   | 0.879      | 1.000      |            |
| MBT | 0.049     | -0.152   | -0.125   | 0.035     | 0.161     | -0.003    | 0.126     | -0.043    | -0.061    | 0.052     | -0.049    | 0.011    | 0.895      | 0.856      | 1.000      |

Numeric colour coding: Green >0.8; yellow between 0.6 and 0.8; red above 0.5 but below 0.6

Table SI-5 Supplemental bivalve species information

| Family               | Species                          | Living conditions                                                                                                                                                                                                                                                                                                                                             | Reproductive cycle                                                                                                                                                                                                                                           |
|----------------------|----------------------------------|---------------------------------------------------------------------------------------------------------------------------------------------------------------------------------------------------------------------------------------------------------------------------------------------------------------------------------------------------------------|--------------------------------------------------------------------------------------------------------------------------------------------------------------------------------------------------------------------------------------------------------------|
| <i>Mytilidae</i>     | <i>Mytilus edulis</i>            | Epilithic, filter feeding. Usually 5-10 cm, but up to 20 cm. Common along the north seaHigh intertidal to shallow subtidal (ca. 5 m), attached by fibrous byssus threads to rocks and other hard substrate. <sup>12</sup>                                                                                                                                     | Spawning season in north sea usully April to October, in France also February – March. In Australia a minor in June and main spawning in August to January. <sup>2</sup>                                                                                     |
|                      | <i>Mytilus Galloprovincialis</i> | Epilithic. Up to 15 cm, slightly larger than M. edulis, and difficult to distinguish by shell shape alone. Invasive species in most of the world due to ballast water and cultivation, native to the Mediterranean coast and the Black and Adriatic Seas. Thrives in sediment-free fast flowing waters, with stands exposure to air for 7 days. <sup>13</sup> | Spawning occurs when the water temperature is highest. Hybridization between species occurs. Major spawning occurs in December-March and June-July. <sup>3</sup>                                                                                             |
|                      | <i>Perna perna</i>               | Epilithic and mangrove roots, filter feeder. 9 cm in intertidal zones, 12 cm in sublittoral zone. Salinity tolerance 15-50 psu, temperature 15-30°C. <sup>14</sup>                                                                                                                                                                                            | Major spawning April-August. <sup>3</sup>                                                                                                                                                                                                                    |
|                      | <i>Brachidontes exustus</i>      | Epilithic and mangrove roots, Filter feeder. 4.6 cm. <sup>15</sup>                                                                                                                                                                                                                                                                                            | Brachidontes exustus has two spawning periods in the spring, between March and April and, in the fall, between September and November                                                                                                                        |
| <i>Isognomonidae</i> | <i>Isognomon alatus</i>          | mangrove roots, Filter feeder. 9.5 cm. The flat tree oyster is found only in the tropical regions of the Atlantic Ocean and Gulf of Mexico (Hall 1985). Isognomon alatus occurs from central Florida to Bermuda, the Bahamas, West Indies, Caribbean Central America, and as far south as                                                                     | Isognomon alatus participates in mass spawning events peaking after the onset of high rains when the salinity of seawater is lower, i.e. September-October is the main spawning events occurs, depending on the hurricane season until January. <sup>4</sup> |

|                     |                             |                                                                                                                                                                                                                                     |                                                                                                                                                                                                                               |
|---------------------|-----------------------------|-------------------------------------------------------------------------------------------------------------------------------------------------------------------------------------------------------------------------------------|-------------------------------------------------------------------------------------------------------------------------------------------------------------------------------------------------------------------------------|
|                     |                             | Brazil (Mikkelsen and Bieler 2008). It is generally found along the sub-tidal and intertidal surfaces of mangrove roots, in particular the red mangrove tree ( <i>Rhizophora mangle</i> L.), at depths of 0.5 – 12 m. <sup>18</sup> |                                                                                                                                                                                                                               |
| <i>Pectinidae</i>   | <i>Chlamys opercularis</i>  | Epibenthic. The queen scallop is found between tidemarks, to depths of 100 m and on sand or gravel, often in high densities. 9 cm. Intertidal, but mostly 10 to 100 m depth. Temperature tolerance is up to 25 °C. <sup>16</sup>    | Minor summer spawning in June-July and a more intensive autumn spawning in September-October <sup>5</sup>                                                                                                                     |
|                     | <i>Chlamys islandica</i>    | Epibenthic. 11 cm 10-100 m depth. Temperature range: arctic to 15 °C. <sup>17</sup>                                                                                                                                                 | Spat settles in October-november. Spawning observed in July and April, probably March-April when ice breaks and phytoplankton blooms occur together with temperature variations from vernal meltwater discharges <sup>6</sup> |
| <i>Ostreidae</i>    | <i>Saccostrea glomerata</i> | Epilithic, filter feeding. Up to 13 cm. Living intertidal to 3 m depth. Salinity range 0 to 38 psu (>20 psu for spat development), 10-30°C <sup>7</sup>                                                                             | Peak spawning November to March, with some locations also in April, May. <sup>8</sup>                                                                                                                                         |
| <i>Veneridae</i>    | <i>Tapes pullastra</i>      | Infaunal, Coastal species in sandy bottoms. from a few meters depth to ca 40 m, dual long siphons, detritus and phytoplankton feeder. Prefers saline waters. up to 6 cm. <sup>19</sup>                                              | During summer. Usually separate sexes, with infrequent hermaphrodites. Spawning induced by temperature rise.                                                                                                                  |
| <i>Corbiculidae</i> | <i>Geloina coaxans</i>      | Infaunal, prefers mudbanks. 15 cm. <sup>20</sup>                                                                                                                                                                                    | Spawning in India periode June – October, with peak in August – September. Maturing starts with temperature rise (October- January), and spawning occurs when salinity and temperature falls <sup>9</sup>                     |



Table SI-6 Supplemental site information on hydrographic conditions and estimation of reproductive cycle status.

| Site             | Hydrographic conditions <sup>§</sup> and date                                                                                                                                                                     | Reproductive cycle                                                                                                         |
|------------------|-------------------------------------------------------------------------------------------------------------------------------------------------------------------------------------------------------------------|----------------------------------------------------------------------------------------------------------------------------|
| 1. Copenhagen    | Most sampled in brackish to low salinity water in the Sound area and beneath. 10 -24 psu                                                                                                                          | All samples was taken outside of the spawning season.                                                                      |
| 2. Faroe Islands | 17-18 August 2006: T 10-12°C, 35 psu                                                                                                                                                                              | Outside Islandic <i>Mytilus edulis</i> spawning season. <sup>10</sup>                                                      |
| 3. Greenland     | 22 August – 2 September:<br>T 2-5°C, 10 psu (Grl4)<br>T 2-5°C, 23 psu (Grl2)<br>T 5-7°C, 24-27 psu (Grl 6, 7)<br>6-7°C, 32 psu (Grl1, 3, 5)                                                                       | Outside Islandic <i>Mytilus edulis</i> and <i>Chlamys islandica</i> spawning season. <sup>10</sup>                         |
| 4. Accra         | 2-10 October: T 26-27°C, 35-36 psu                                                                                                                                                                                | Upper temperature limit for spawning of <i>Mytilus edulis</i>                                                              |
| 5. Cape Town     | 15-18 October: T 11-14°C, 35 psu                                                                                                                                                                                  | Outside <i>Perna perna</i> spawning season                                                                                 |
| 6. Perth         | 19-23 November: T 20-21°C, 36 psu<br>Salinity in summer (October forward) is high (30 psu) at all stations, in winter salinity decreases as freshwater streams out. PER6 most affected, decreasing effect outward | All collected by hand during low tide, except the Coombe, collected by diver at 6 m depth<br><br>Middle of spawning season |
| 7. Hobart        | 6-8 December: 13-14°C, 34-35 psu                                                                                                                                                                                  | Last half of spawning season                                                                                               |
| 8. Sydney        | 9-14 December: 21-23°C, 34-35 psu                                                                                                                                                                                 | Last half of spawning season                                                                                               |
| 9. Gizo/Rarumana | 28-31 December: 29-30°C, 34-35 psu                                                                                                                                                                                |                                                                                                                            |
| 10. Christchurch | 7 January 2007: 14-15°C, 34 psu                                                                                                                                                                                   | End of spawning season                                                                                                     |
| 11. Chile        | 3 February: 17-18°C, 22 psu (Chi1)<br>17-18°C, 24-28 psu (Chi2)                                                                                                                                                   | After spawning season for Australia                                                                                        |
| 12. St. Croix    | 21-29 March: 26-27°C, 36 psu                                                                                                                                                                                      | Probably in spawning season for <i>Brachidontes exustus</i> ,<br>Outside of spawning season of <i>Isognomon alatus</i>     |
| 13. Boston       | 11-14 April: 4-5°C, 30-33 psu                                                                                                                                                                                     | Outside of spawning season                                                                                                 |
| 14. Open water   | 16 April: 0-1°C, 32-35 psu (OW1)<br>23 April: 8-9°C, 34-35 psu (OW2)                                                                                                                                              | Outside of spawning season for both chlamys species sampled                                                                |

§: All dates, salinity and temperature data from Satellite Eye for Galathea<sup>11</sup>

## REFERENCES

1. OSPAR, OSPAR Commission, London, Editon edn., 2005, vol. OSPAR Agreement 2005-6, p. 4.
2. T. Dix and A. Ferguson, *Australian Journal of Marine and Freshwater Research*, 1984, **35**, 307 - 313.
3. Y.-M. ABADA-BOUDJEMA and J.-C. DAUVIN, *J. Mollus. Stud.*, 1995, **61**, 467-481.
4. A. M. Siung, *Bulletin of Marine Science*, 1980, **30**, 90-101.
5. J. D. Paul, *J. moll. Stud.*, 1981, **47**, 53-58.
6. S. a. Pedersen, *J. Northw. Atl. Fish. Sci.*, 1994, **16**, 75-87.
7. M. C. Dove and W. A. O'Connor, *J. Shellfish Res.*, 2007, **26**, 939-947.
8. J. D. BOOTH, *New Zealand Journal of Marine and Freshwater Research*, 1983, **17**, 231-226.
9. S. Clemente and B. Ingole, *Marine Biology Research*, 2009, **5**, 109-121.
10. OSPAR, OSPAR Commision, London, Editon edn., 2010, vol. Agreement 1999-02, p. 120.
11. [www.satelliteeye.dk/index\\_uk.htm](http://www.satelliteeye.dk/index_uk.htm), *Satellite Eye for Galathea 3*, [www.satelliteeye.dk/index\\_uk.htm](http://www.satelliteeye.dk/index_uk.htm).

### *Further web pages and databases used to find species information:*

12. The Marine Life Network: Common mussel, accessed 7 February 2011. <http://www.marlin.ac.uk/speciesfullreview.php?speciesID=3848>
13. Global Invasive Species Database: *M. gallaprovincialis*, accessed 22 January 2011, <http://www.issg.org/database/species/ecology.asp?si=102&fr=1&sts>
14. Global Invasive Species Database: *P. perna*, accessed 22 January 2011, <http://www.issg.org/database/species/ecology.asp?si=742&fr=1&sts>
15. Global Invasive Species Database: *B. exustus*, accessed 22 January 2011: [http://www.sms.si.edu/irlspec/Brachidontes\\_exustus.htm](http://www.sms.si.edu/irlspec/Brachidontes_exustus.htm)
16. The Marine Life Network: Queen scallop: accessed 22 January 2011. <http://www.marlin.ac.uk/speciesinformation.php?speciesID=2390>
17. Sealife base: *Chlamys islandica*, accessed 7 February 2011. <http://www.sealifebase.org/summary/SpeciesSummary.php?id=47720>
18. Smithsonian Marine Station at Fort Pierce: *Isognomon alatus*, Accessed 7 February 2011. [http://www.sms.si.edu/irlspec/Isognomon\\_alatus.htm](http://www.sms.si.edu/irlspec/Isognomon_alatus.htm)
19. Food and agricultural organization of the United Nations, fisheries & Aquaculture department: *Venerupis pullastra*, Accessed 7 February 2011. [http://www.fao.org/fishery/culturedspecies/Venerupis\\_pullastra/en](http://www.fao.org/fishery/culturedspecies/Venerupis_pullastra/en)
20. Birds and nature: Almindelig tæppemusling (in Danish), accessed 7 February 2011 <http://www.fugleognatur.dk/artsbeskrivelse.asp?ArtsID=4796>,
